# Supplementary material for: Point-of-Care Lung Ultrasound for Detecting Severe Presentations of Coronavirus Disease 2019 in the Emergency Department: A Retrospective Analysis
Source: PubMed Central journal article supplement — Crit Care Explor. 2020 Jul 31;2(8):e0176. doi: 10.1097/CCE.0000000000000176 (PMC7402420; doi:10.1097/cce.0000000000000176), 2020-07-31
Supplement: cc9-2-e0176-s001.pdf [file cc9-2-e0176-s001.pdf]

L1

SUPERIOR  
ANTERIOR

CS-28  
DATE/TIME: 07/26/2016  
08:11:00  
PAT: 1000000000  
L1

L3

SUPERIOR  
LATERAL

CS-28  
DATE/TIME: 07/26/2016  
08:11:00  
PAT: 1000000000  
L3

L2

INFERIOR  
ANTERIOR

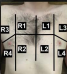

L4

INFERIOR  
LATERAL

CS-28  
DATE/TIME: 07/26/2016  
08:11:00  
PAT: 1000000000  
L4

**R1**  
**SUPERIOR**  
**ANTERIOR**

**R2**  
**INFERIOR**  
**ANTERIOR**

**R3**  
**SUPERIOR**  
**LATERAL**

**R4**  
**INFERIOR**  
**LATERAL**

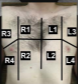

PA-View 8  
DATE/TIME: 07/08/2019  
10:04:10 AM  
10.0 cm  
2007194  
10.0  
100

PA-View 9  
DATE/TIME: 07/08/2019  
10:04:10 AM  
10.0 cm  
2007194  
10.0  
100

PA-View 10  
DATE/TIME: 07/08/2019  
10:04:10 AM  
10.0 cm  
2007194  
10.0  
100
